# Supplementary material for: Introducing oxygen vacancies to NiFe LDH through electrochemical reduction to promote the oxygen evolution reaction
Source: Royal Society of Chemistry journal article supplement (doi:10.1039/d2dt00749e), 2022-01-01
Supplement: d2dt00749e1.pdf [file d2dt00749e1.pdf]

## Supporting Information

# Introducing Oxygen Vacancies to NiFe LDH through Electrochemistry Reduction to Promote Oxygen Evolution Reaction

Xiaoman Hou <sup>a</sup>, Jing Li <sup>b</sup>, Jian Zheng <sup>a</sup>, Luming Li <sup>c</sup> and Wei Chu <sup>\*a</sup>

## Experimental and Characteristics

### Comparison experiment

1. Different methods to prepare NiFe LDH:

(1) Hydrothermal method (HT): Disperse  $\text{Ni}(\text{NO}_3)_2 \cdot 6\text{H}_2\text{O}$  (1.890 g),  $\text{Fe}(\text{NO}_3)_3 \cdot 9\text{H}_2\text{O}$  (0.263 g) and precipitation agent urea (8.64 g) in deionized water (120 mL), and stirred for 15 min to obtain transparent solution, then transferred to a Teflon-lined stainless steel autoclave treated at 120 °C for 12 h. The powder was collected by repetitive centrifugation at 8000 rpm for 3 min and washed several times by  $\text{H}_2\text{O}$  and EtOH, then dried at 60 °C in oven for 24 h.

(2) Co-precipitation (CP): Disperse  $\text{Ni}(\text{NO}_3)_2 \cdot 6\text{H}_2\text{O}$  (1.890 g),  $\text{Fe}(\text{NO}_3)_3 \cdot 9\text{H}_2\text{O}$  (0.263 g) in deionized water (120 mL) and stir to form a transparent metal salt solution. In a 60 °C water bath, slowly drip the metal salt solution and 1 M NaOH solution into 50 mL 0.15 M  $\text{Na}_2\text{CO}_3$  solution under stirring, and control the pH value of the solution to about  $10 \pm 0.5$ . After the dropwise addition of the metal salt solution was completed, the precipitate was aged at 60 °C for 18 hours. The powder was collected by repetitive centrifugation at 8000 rpm for 3 min and washed several times by  $\text{H}_2\text{O}$  and EtOH, then dried at 60 °C in oven for 24 h.

2. Preparation of MN LDH (M, N = Ni, Co, Fe)

NiCo LDH, CoFe LDH, and NiCoFe LDH were synthesized by microwave heating method as the synthesis of NiFe LDH. Among them, except for the change in the quality of the metal salt, the other experimental conditions remain the same.  $\text{Ni}(\text{NO}_3)_2 \cdot 6\text{H}_2\text{O}$  is 0.419 g and  $\text{Co}(\text{NO}_3)_2 \cdot 6\text{H}_2\text{O}$  is

---

<sup>a</sup> College of Chemical Engineering, Sichuan University, Chengdu 610065, China. E-mail: [chuwe1965@scu.edu.cn](mailto:chuwe1965@scu.edu.cn).

<sup>b</sup> Department of chemistry, Tsinghua University, Beijing 100084, China.

<sup>c</sup> Institute for Advanced Study, Chengdu University, Chengdu 610106, China.

1.676 g in NiCo LDH.  $\text{Co}(\text{NO}_3)_2 \cdot 6\text{H}_2\text{O}$  is 1.892 g and  $\text{Fe}(\text{NO}_3)_3 \cdot 9\text{H}_2\text{O}$  is 0.263 g in CoFe LDH.  $\text{Ni}(\text{NO}_3)_2 \cdot 6\text{H}_2\text{O}$  is 0.378 g,  $\text{Co}(\text{NO}_3)_2 \cdot 6\text{H}_2\text{O}$  is 1.513 g,  $\text{Fe}(\text{NO}_3)_3 \cdot 9\text{H}_2\text{O}$  is 0.263 g in NiCoFe LDH. The molar ratio of metal salt is the optimal ratio determined by our previous work.

### 3. Preparation of NiFe LDH/X (X = Cu Foam, carbon cloth)

NiFe LDH/Cu Foam (CF,  $1 \times 1 \text{ cm}^2$ ) and NiFe LDH/Carbon Cloth (CC,  $1 \times 1 \text{ cm}^2$ ) were prepared by replacing NF substrate. The method was the same as the synthesis of NiFe LDH/NF.

## Calculation of Faradaic Efficiency

The Faradaic Efficiency of OER was estimated using the following equation:

$$\text{FE} = 4F n_{\text{O}_2} / It \times 100\%$$

Where F is Faraday constant (96485 C/mol),  $n_{\text{O}_2}$  is the number of moles of experimental  $\text{O}_2$  during the reaction (mol), I is the current of the reaction (A), t is the reaction time (s).

## Tafel slope measured by steady-state polarization

In order to compare with the Tafel slope calculated by the LSV curve, the steady-state method is used to measure Tafel slope. Set the voltage and reaction time by potentiostatic method to measure the current density at a steady state. Then the logarithm of the current density ( $\log|j|$ ) at steady state is plotted against the overpotential ( $\eta$ ), and the Tafel slope can be obtained by fitting linear curves, as shown in Fig. S17.

## ICP-MS measurement

The content of Ni and Fe in the KOH solution of r-NiFe LDH before and after 1000 CV cycles were measured by ICP-MS, as shown in Table S3. The content of Ni and Fe have a very small increase that can be ignored, indicating r-NiFe LDH has excellent stability.

## Figures and Tables

**Amperometric i-t Curve Parameters** ✕

|                             |                                      |        |
|-----------------------------|--------------------------------------|--------|
| Init E (V) .....            | <input type="text" value="-1.5"/>    | OK     |
| Sample Interval (sec) ..... | <input type="text" value="0.1"/>     | Cancel |
| Run Time (sec) .....        | <input type="text" value="50"/>      | Help   |
| Quiet Time (sec) .....      | <input type="text" value="0"/>       |        |
| Scales during Run .....     | <input type="text" value="1"/>       |        |
| Sensitivity (A/V) .....     | <input type="text" value="1.e-001"/> |        |

Auxiliary Signal Recording

Fig. S1 Schematic diagram of parameter setting of I-T (-1.5 V , 50 s)

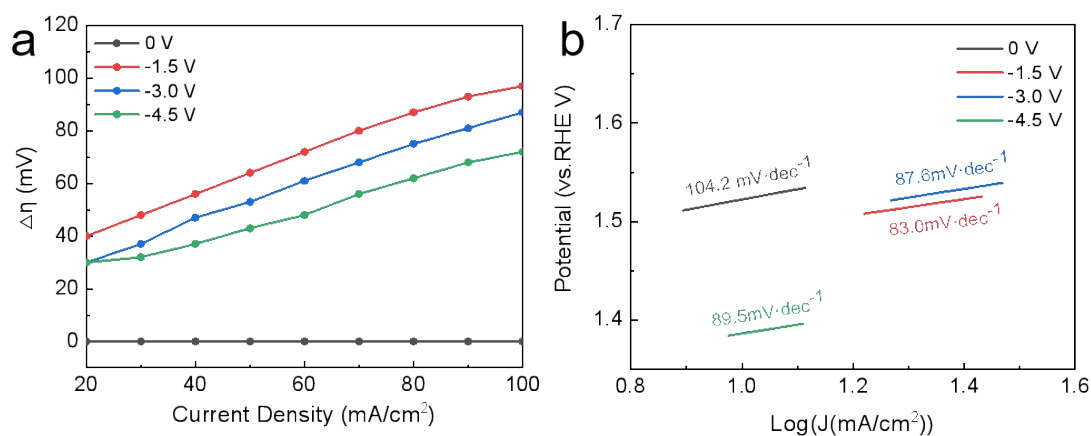

Fig. S2 Samples of different reduction potential (a)  $\Delta\eta$ -j chart, (b) Tafel plots

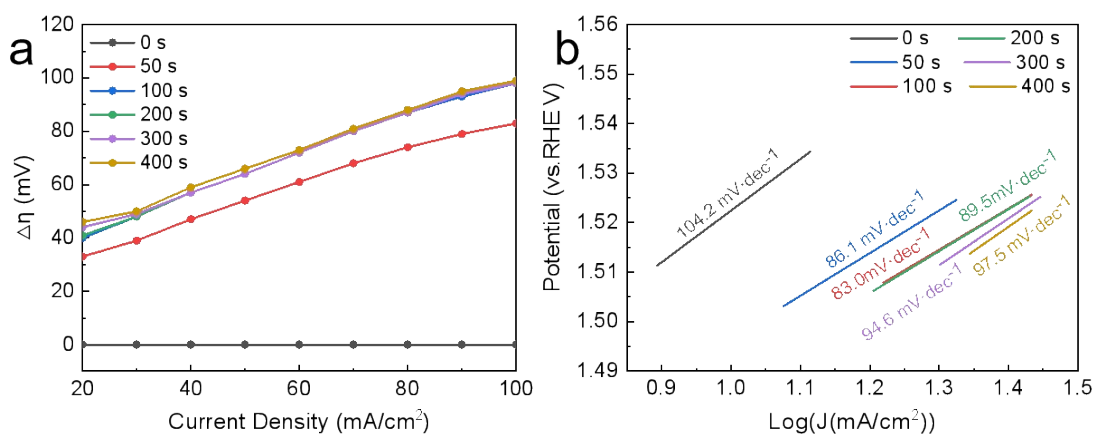

Fig. S3 Samples of different reduction time (a)  $\Delta\eta$ -j chart, (b) Tafel plots

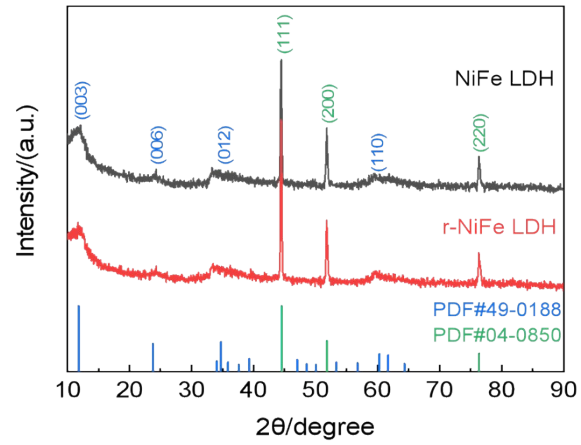

Fig. S4 XRD patterns of NiFe LDH and r-NiFe LDH

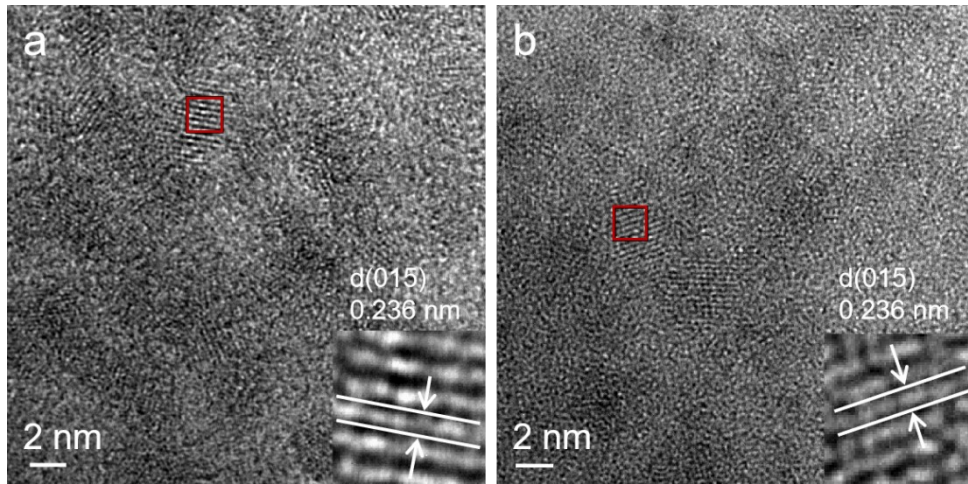

Fig. S5 HRTEM image of (a) NiFe LDH and (b) r-NiFe LDH

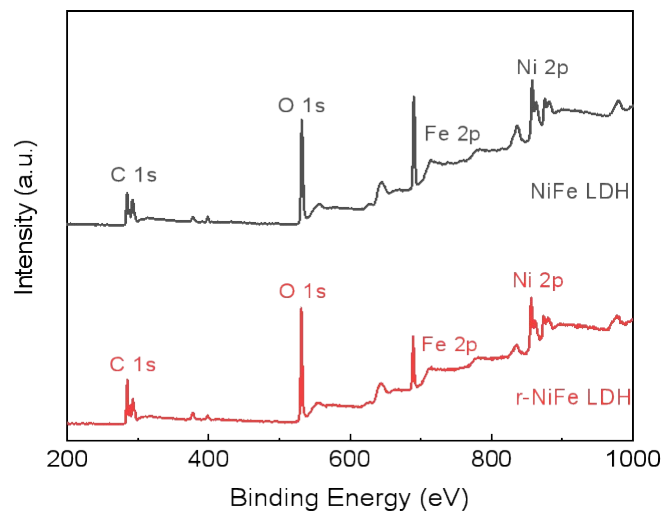

Fig. S6 XPS spectra of NiFe LDH and r-NiFe LDH

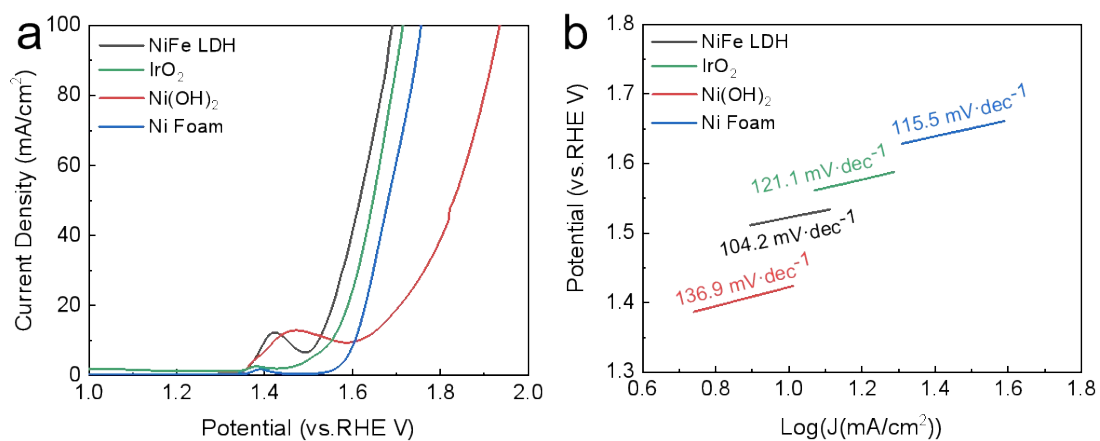

Fig. S7 Comparison samples (a) LSV curves, (b) Tafel plots

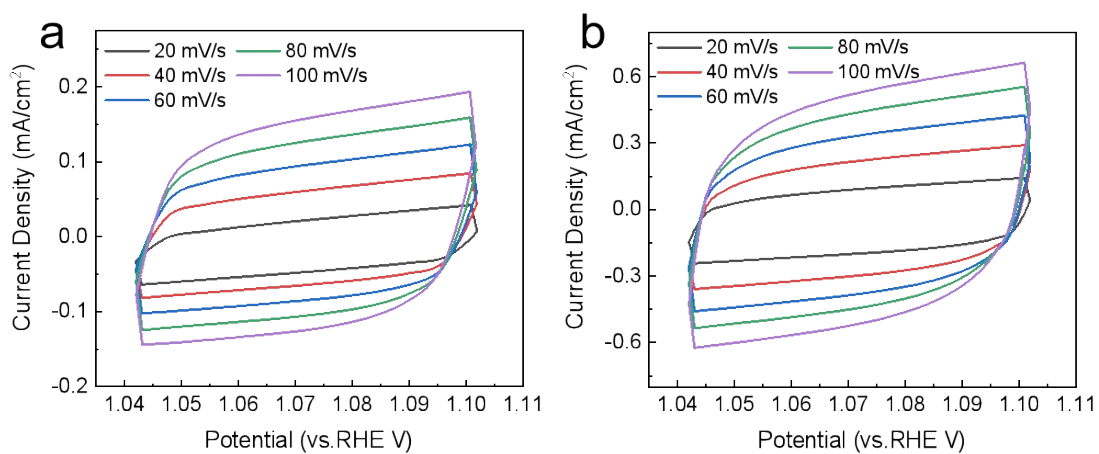

Fig. S8 The CV curves at different scan rates (20, 40, 60, 80, 100 mV/s) of (a) NiFe LDH and (b) r-NiFe LDH

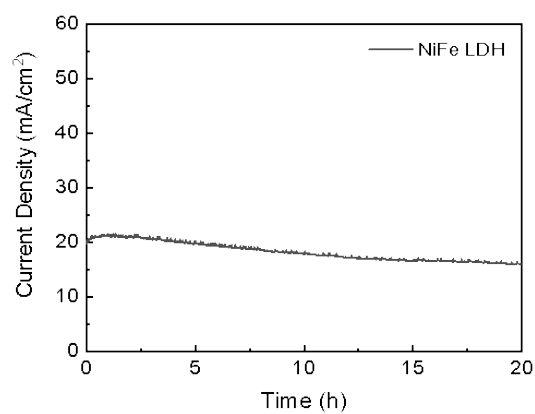

Fig. S9 Stability test of NiFe LDH at current density of 20 mA·cm<sup>-2</sup>

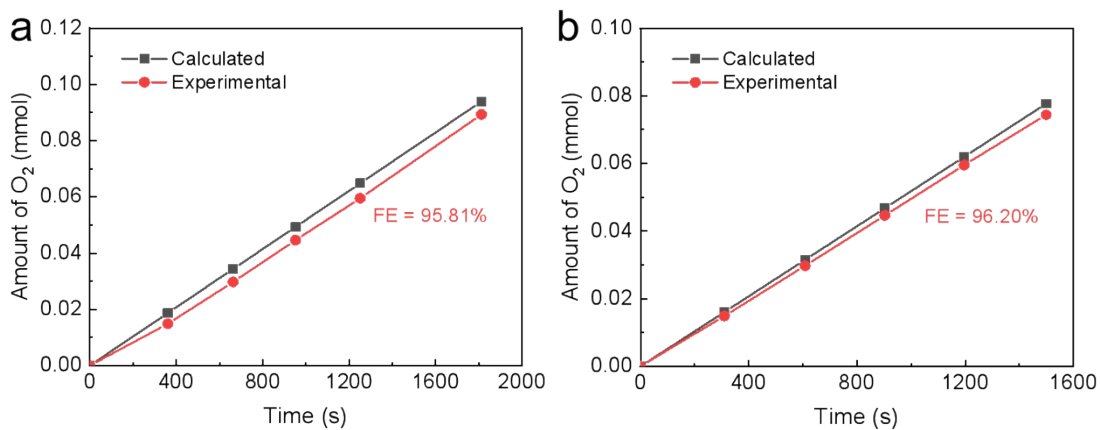

Fig. S10 The amount of O<sub>2</sub> theoretically calculated and experimentally measured versus time at current density of 20 mA·cm<sup>-2</sup> : (a) NiFe LDH, (b) r-NiFe LDH

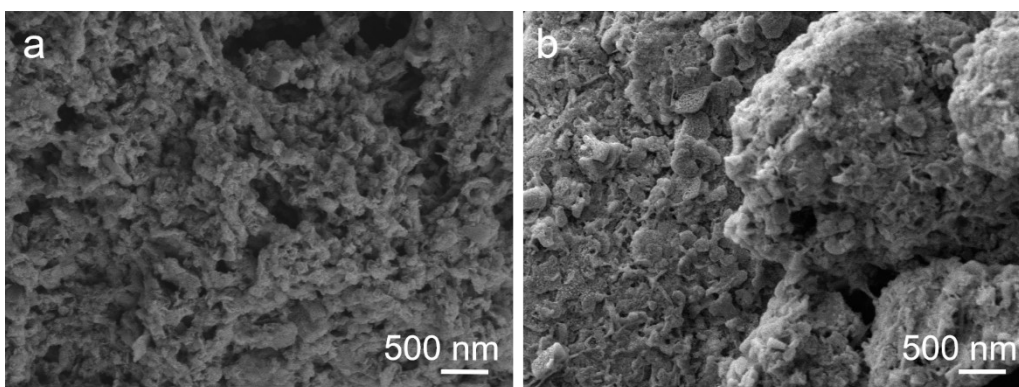

Fig. S11 SEM images of r-NiFe LDH (a) before and (b) after stability test

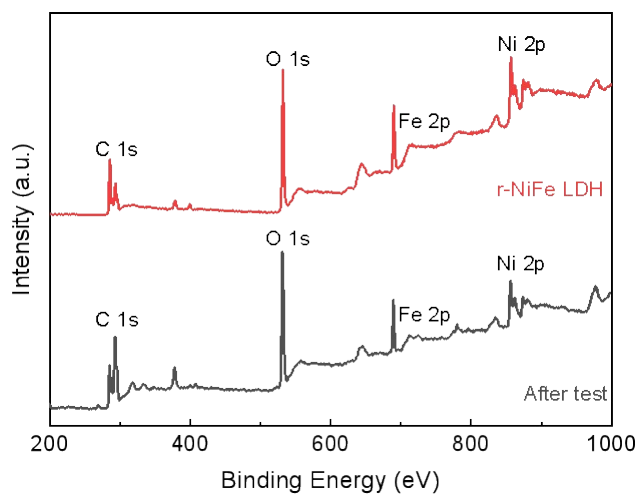

Fig. S12 XPS spectra of r-NiFe LDH before and after stability test

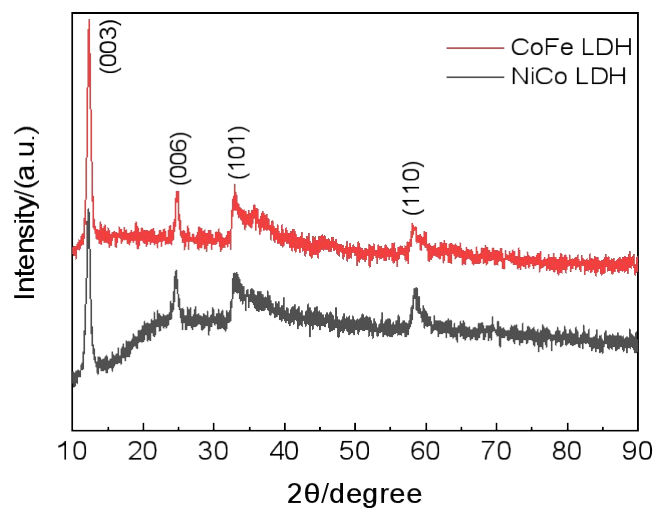

Fig. S13 XRD patterns of CoFe LDH and NiCo LDH

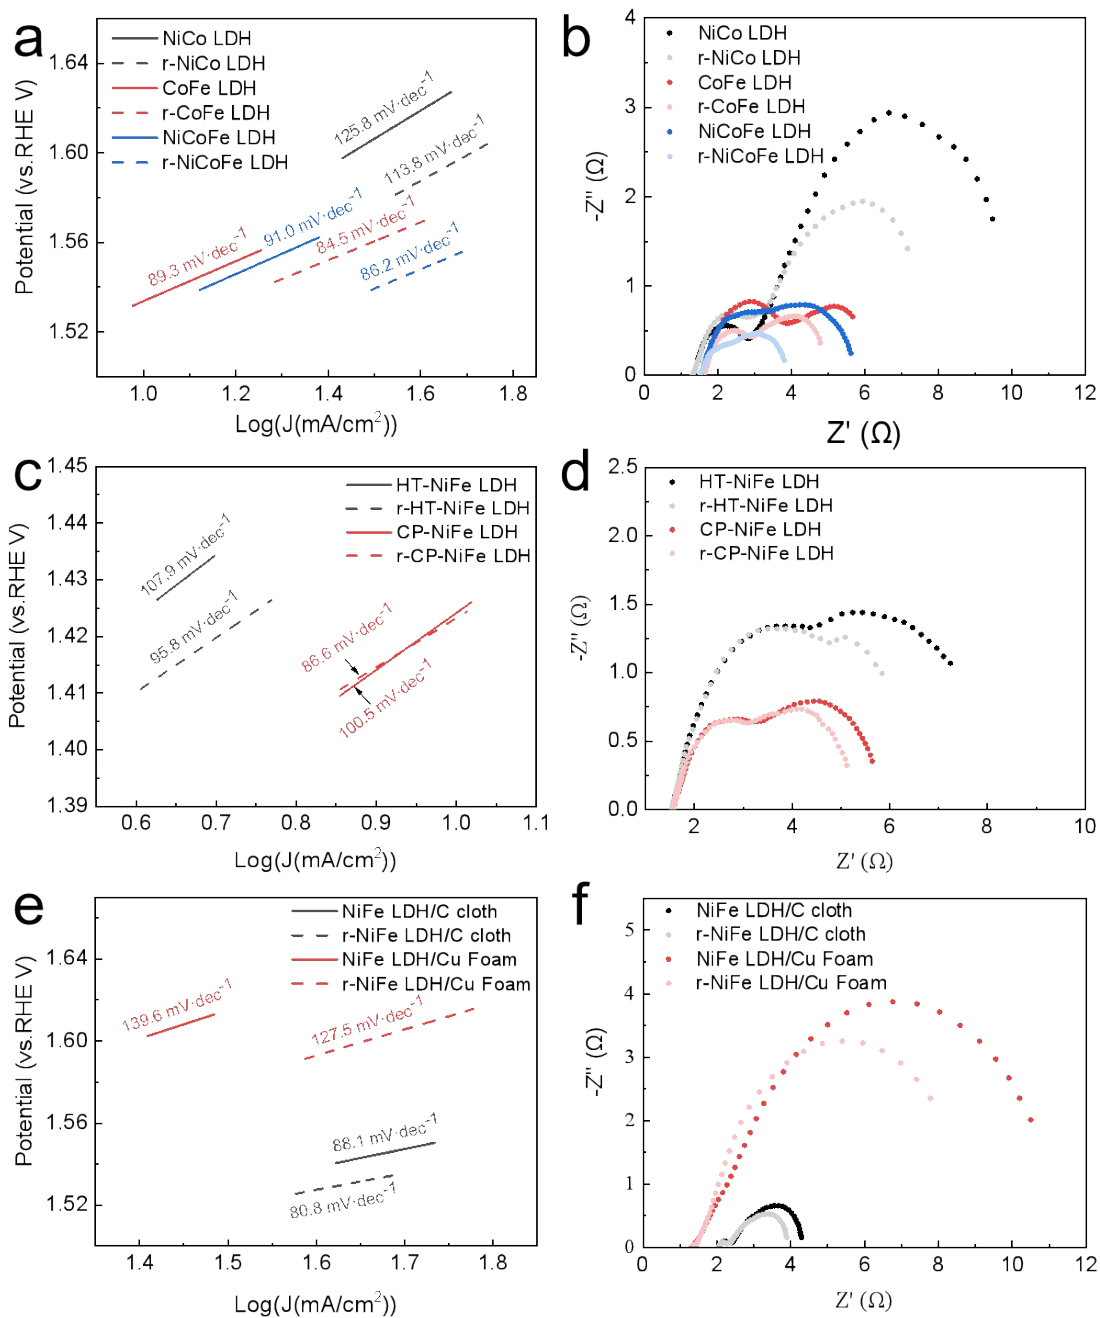

Fig. S14 The Tafel plots of (a) MN LDH (M, N = Ni, Co, Fe), (c) NiFe LDH synthesized by hydrothermal method and co-precipitation method, (e) NiFe LDH/X (X = Carbon Cloth, Cu Foam); The EIS curves of (b) MN LDH (M, N = Ni, Co, Fe), (d) NiFe LDH synthesized by hydrothermal method and co-precipitation method, (f) NiFe LDH/X (X = Carbon Cloth, Cu Foam).

Table S1 Comparison of OER performance for the present catalyst with some catalysts reported in



the literature.

| Catalyst                                 | Overpotential@<br>Density Current<br>(mV@ mA·cm <sup>-2</sup> ) | Tafel slope<br>(mV·dec <sup>-1</sup> ) | Substrate          | Refs.     |
|------------------------------------------|-----------------------------------------------------------------|----------------------------------------|--------------------|-----------|
| r-NiFe LDH                               | 285@20                                                          | 83.0                                   | Ni Foam            | This work |
| r-NiFe LDH                               | 305@50                                                          | 80.8                                   | Carbon Cloth       | This work |
| Fe-Ni(OH) <sub>2</sub>                   | 285@50                                                          | 223.5                                  | Ni Foam            | 1         |
| Ni <sub>1-x</sub> Fe <sub>x</sub> OOH    | 320@10                                                          | /                                      | Au discs           | 2         |
| NiFe LDH-PANI                            | 220@10                                                          | 44                                     | Carbon Paper       | 3         |
| NiFe LDH                                 | 260@10                                                          | 55                                     | Carbon Paper       | 3         |
| NiFe-MOF                                 | 215@10                                                          | 49.1                                   | /                  | 4         |
| NaBH <sub>4</sub> -NiFe LDH              | 280@10                                                          | 56                                     | Ni Foam            | 5         |
| NiFe <sub>2</sub> O <sub>4</sub>         | 324@10                                                          | 132                                    | Ni Foam            | 6         |
| NiFe-LDH/CF                              | 382@10                                                          | 124                                    | Carbon Fiber       | 7         |
| A-NiFeLDH                                | 241@10                                                          | 55                                     | Glassy Carbon      | 8         |
| nNiFe LDH/3D MPC                         | 340@10                                                          | 71                                     | /                  | 9         |
| NiFeMn-LDH                               | 289@20                                                          | 47                                     | /                  | 10        |
| Fe-CoOOH/G                               | 330@10                                                          | 37                                     | GO                 | 11        |
| NiCoFe-LDH                               | 276@10                                                          | 56                                     | Ni Foam            | 12        |
| NiFeLDH/NiTe                             | 228@50                                                          | 51.04                                  | Ni Foam            | 13        |
| Ni <sub>3</sub> N@Fe <sub>3</sub> N      | 296@10                                                          | 40                                     | Carbon Fiber       | 14        |
| Ni <sub>1.5</sub> Fe <sub>0.5</sub> P/CF | 264@10                                                          | 55                                     | Carbon Fiber       | 15        |
| V10-Ni <sub>2</sub> P                    | 308@10                                                          | 75.1                                   | Glassy Carbon      | 16        |
| NiFe-Se/CFP                              | 281@10                                                          | 40.93                                  | Carbon Fiber Paper | 17        |

Table S2 Equivalent analog circuit parameters of NiFe and r-NiFe

| Samples    | $R_s$                           | CPE1                              | R1                              | CPE2                              | R2                              |
|------------|---------------------------------|-----------------------------------|---------------------------------|-----------------------------------|---------------------------------|
|            | $(\Omega \cdot \text{cm}^{-2})$ | $(\text{F} \cdot \text{cm}^{-2})$ | $(\Omega \cdot \text{cm}^{-2})$ | $(\text{F} \cdot \text{cm}^{-2})$ | $(\Omega \cdot \text{cm}^{-2})$ |
| NiFe LDH   | 1.305                           | 0.0067856                         | 1.296                           | 0.063453                          | 2.581                           |
| r-NiFe LDH | 1.415                           | 0.16889                           | 0.76093                         | 0.10149                           | 1.313                           |

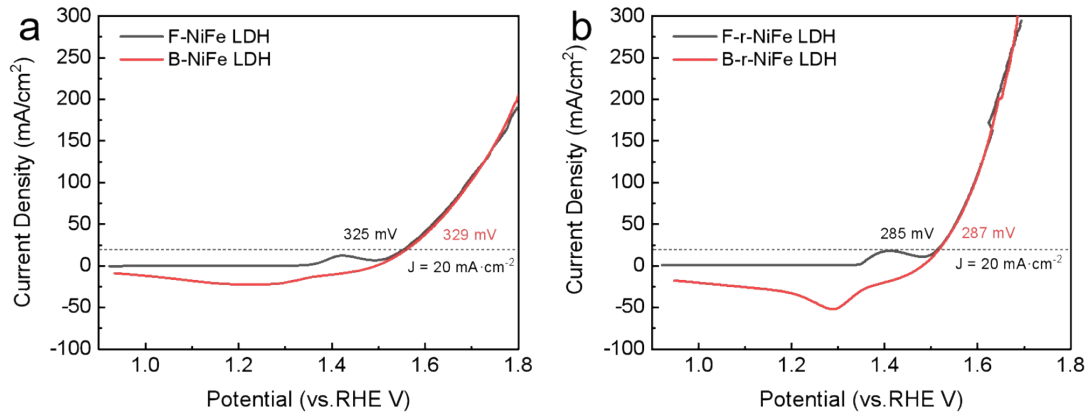

Fig. S15 Comparison between the LSV curves (from 0.9 V to 1.8 V) and CV measurement (from 1.8 V to 0.9 V) of (a) NiFe LDH, (b) r-NiFe LDH.

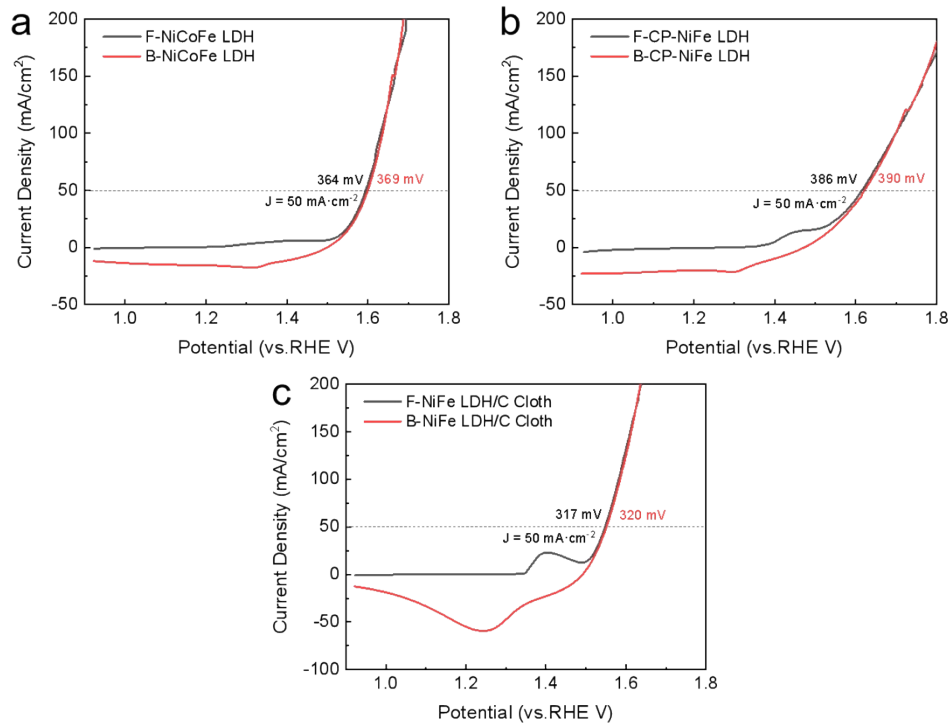

Fig. S16 Comparison between the LSV curves (from 0.9 V to 1.8 V) and CV measurement (from 1.8 V to 0.9 V) of (a) NiCoFe LDH, (b) CP-NiFe LDH, (c) NiFe LDH/C Cloth

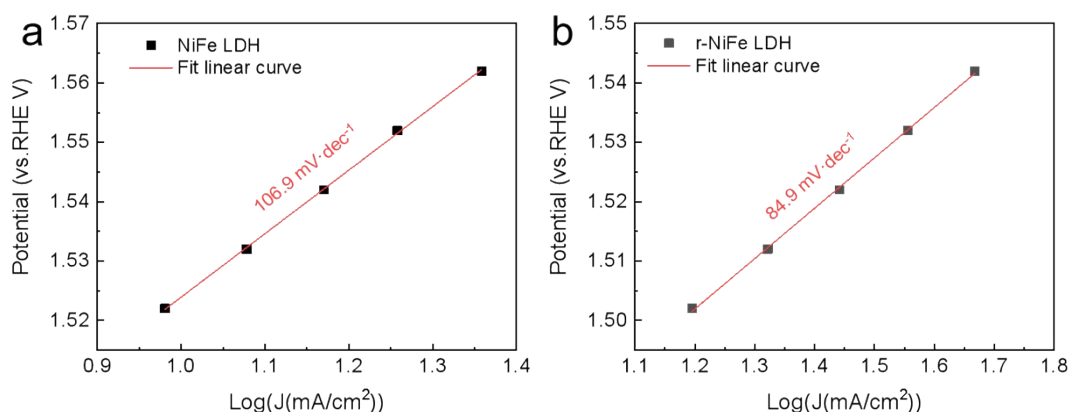

Fig. S17 Tafel slopes measured by steady-state polarization of (a) NiFe LDH, (b) r-NiFe LDH.

Table S3 ICP analysis of Ni and Fe in the KOH before and after 1000 cycles

| Sample             | Ni ( $\mu\text{g/L}$ ) | Fe ( $\mu\text{g/L}$ ) |
|--------------------|------------------------|------------------------|
| Before 1000 cycles | 17.2                   | 39.0                   |
| After 1000 cycles  | 87.9                   | 89.3                   |

## References

1. J. Li, T. Hu, C. Wang and C. Guo, *Green Energy Environ.*, 2020, DOI: 10.1016/j.gee.2020.11.009.
2. S. Klaus, M. W. Louie, L. Trotochaud and A. T. Bell, *J. Phys. Chem. C*, 2015, **119**, 18303-18316.
3. J. Zhang, H. Zhang and Y. Huang, *Appl. Catal. B*, 2021, **297**, 120453.
4. C. Chen, Z. Yang, W. Liang, H. Yan, Y. Tuo, Y. Li, Y. Zhou and J. Zhang, *J. Energy Chem*, 2021, **55**, 345-354.
5. Y. Wang, S. Tao, H. Lin, S. Han, W. Zhong, Y. Xie, J. Hu and S. Yang, *RSC Adv.*, 2020, **10**, 33475-33482.
6. X. Li, W. Q. Huang, L. X. Xia, Y. Y. Li, H. W. Zhang, S. F. Ma, Y. M. Wang, X. J. Wang and G. F. Huang, *ChemElectroChem*, 2020, **7**, 4047-4054.
7. Y. Lin, H. Wang, C. K. Peng, L. Bu, C. L. Chiang, K. Tian, Y. Zhao, J. Zhao, Y. G. Lin, J. M. Lee and L. Gao, *Small*, 2020, **16**, e2002426.
8. J. Liu, J. Zhou, S. Liu, G. Chen, W. Wu, Y. li, P. Jin and C. Xu, *Electrochim. Acta*, 2020, **356**.
9. W. Wang, Y. Liu, J. Li, J. Luo, L. Fu and S. Chen, *J. Mater. Chem. A*, 2018, **6**, 14299-14306.
10. Z. Lu, L. Qian, Y. Tian, Y. Li, X. Sun and X. Duan, *Chem Commun (Camb)*, 2016, **52**, 908-911.
11. X. Han, C. Yu, S. Zhou, C. Zhao, H. Huang, J. Yang, Z. Liu, J. Zhao and J. Qiu, *Adv. Energy Mater.*, 2017, **7**.
12. Y. Qin, F. Wang, J. Shang, M. Iqbal, A. Han, X. Sun, H. Xu and J. Liu, *J. Energy Chem*, 2020, **43**, 104-107.
13. Y. Dou, C.-T. He, L. Zhang, M. Al-Mamun, H. Guo, W. Zhang, Q. Xia, J. Xu, L. Jiang, Y. Wang, P. Liu, X.-M. Chen, H. Yin and H. Zhao, *Cell Reports Physical Science*, 2020, **1**.

14. H. Huang, C. Yu, X. Han, S. Li, S. Cui, C. Zhao, H. Huang and J. Qiu, *Ind. Eng. Chem. Res.*, 2017, **56**, 14245-14251.
15. H. Huang, C. Yu, C. Zhao, X. Han, J. Yang, Z. Liu, S. Li, M. Zhang and J. Qiu, *Nano Energy*, 2017, **34**, 472-480.
16. K. N. Dinh, X. Sun, Z. Dai, Y. Zheng, P. Zheng, J. Yang, J. Xu, Z. Wang and Q. Yan, *Nano Energy*, 2018, **54**, 82-90.
17. Y. Guo, C. Zhang, J. Zhang, K. Dastafkan, K. Wang, C. Zhao and Z. Shi, *ACS Sustainable Chem. Eng.*, 2021, **9**, 2047-2056.
